# Supplementary material
Source: publisher site journal article supplement (https://www.dovepress.com/article/359185)
Supplement: Supplementary file 1 [file get_supplementary_file.php]

**SUPPLEMENTARY MATERIALS**

**Table S1: CONSORT checklist**


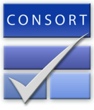
CONSORT 2010 checklist of information to include when reporting a randomised trial*

| Section/Topic | Item No | Checklist item | Reported on page No |
| --- | --- | --- | --- |
| Title and abstract | | | |
|  | 1a | Identification as a randomised trial in the title | 1 |
| 1b | Structured summary of trial design, methods, results, and conclusions (for specific guidance see CONSORT for abstracts) | 2 |
| Introduction | | | |
| Background and objectives | 2a | Scientific background and explanation of rationale | 3-4 |
| 2b | Specific objectives or hypotheses | 5 |
| Methods | | | |
| Trial design | 3a | Description of trial design (such as parallel, factorial) including allocation ratio | 5 |
| 3b | Important changes to methods after trial commencement (such as eligibility criteria), with reasons | 10 |
| Participants | 4a | Eligibility criteria for participants | 5 |
| 4b | Settings and locations where the data were collected | 5-6 |
| Interventions | 5 | The interventions for each group with sufficient details to allow replication, including how and when they were actually administered | 8-9 |
| Outcomes | 6a | Completely defined pre-specified primary and secondary outcome measures, including how and when they were assessed | 7-8 |
| 6b | Any changes to trial outcomes after the trial commenced, with reasons | N/A |
| Sample size | 7a | How sample size was determined | 10 |
| 7b | When applicable, explanation of any interim analyses and stopping guidelines | 11 |
| Randomisation: |  |  |  |
| Sequence generation | 8a | Method used to generate the random allocation sequence | 6-7 |
| 8b | Type of randomisation; details of any restriction (such as blocking and block size) | 6-7 |
| Allocation concealment mechanism | 9 | Mechanism used to implement the random allocation sequence (such as sequentially numbered containers), describing any steps taken to conceal the sequence until interventions were assigned | 6-7 |
| Implementation | 10 | Who generated the random allocation sequence, who enrolled participants, and who assigned participants to interventions | 6-7 |
| Blinding | 11a | If done, who was blinded after assignment to interventions (for example, participants, care providers, those assessing outcomes) and how | 6-7 |
| 11b | If relevant, description of the similarity of interventions | N/A |
| Statistical methods | 12a | Statistical methods used to compare groups for primary and secondary outcomes | 11 |
| 12b | Methods for additional analyses, such as subgroup analyses and adjusted analyses | 11 |
| Results | | | |
| Participant flow (a diagram is strongly recommended) | 13a | For each group, the numbers of participants who were randomly assigned, received intended treatment, and were analysed for the primary outcome | 12 |
| 13b | For each group, losses and exclusions after randomisation, together with reasons | 13 |
| Recruitment | 14a | Dates defining the periods of recruitment and follow-up | 10 |
| 14b | Why the trial ended or was stopped | 10 |
| Baseline data | 15 | A table showing baseline demographic and clinical characteristics for each group | 13 |
| Numbers analysed | 16 | For each group, number of participants (denominator) included in each analysis and whether the analysis was by original assigned groups | 11, 12 |
| Outcomes and estimation | 17a | For each primary and secondary outcome, results for each group, and the estimated effect size and its precision (such as 95% confidence interval) | Table 2 |
| 17b | For binary outcomes, presentation of both absolute and relative effect sizes is recommended | N/A |
| Ancillary analyses | 18 | Results of any other analyses performed, including subgroup analyses and adjusted analyses, distinguishing pre-specified from exploratory | 15, table S2 |
| Harms | 19 | All important harms or unintended effects in each group (for specific guidance see CONSORT for harms) | 14 |
| Discussion | | | |
| Limitations | 20 | Trial limitations, addressing sources of potential bias, imprecision, and, if relevant, multiplicity of analyses | 18 |
| Generalisability | 21 | Generalisability (external validity, applicability) of the trial findings | 18 |
| Interpretation | 22 | Interpretation consistent with results, balancing benefits and harms, and considering other relevant evidence | 16-18 |
| Other information | | |  |
| Registration | 23 | Registration number and name of trial registry | 5 |
| Protocol | 24 | Where the full trial protocol can be accessed, if available | 5 |
| Funding | 25 | Sources of funding and other support (such as supply of drugs), role of funders | 19 |

**Table S2. Sensitivity analysis: within- and between-group treatment effects on cognition (verbal fluency test), following multiple imputations (N = 80)**

| **VF category** | **Group** | **Baseline, mean (SD)** | **Follow-up, mean (SD)** | **Within group change (95% CI)** | **Group effect, ANCOVA*** | | | **Between-group contrasts**  **p-value** (Hedges’ g)** | | |
| --- | --- | --- | --- | --- | --- | --- | --- | --- | --- | --- |
|  |  |  |  |  | F | p-value | Yoga vs AE | | Yoga vs. WLC | AE vs WLC |
| **Total FAS** | **All participants** |  |  |  | 2.51 | 0.088 | 1.000 (-0.16) | | 0.223 (0.49) | 0.124 (0.56) |
| **Yoga (n = 27)** | 43.6 (13.1) | 48.3 (14.0) | 4.7 (1.8, 7.5) |  |  |  | |  |  |
| **Aerobic exercise (n = 29)** | 38.3 (12.0) | 44.5 (15.7) | 6.1 (2.2, 10.1) |  |  |  | |  |  |
| **Wait-list control (n = 24)** | 41.3 (14.0) | 41.7 (12.2) | 0.4 (-3.8, 4.6) |  |  |  | |  |  |
| **Animals** | **All participants** |  |  |  | 1.88 | 0.159 | 0.972 (0.11) | | 0.168 (0.27) | 0.908 (0.18) |
| **Yoga (n = 27)** | 21.6 (5.3) | 23.5 (6.1) | 1.9 (-0.2, 4.0) |  |  |  | |  |  |
| **Aerobic exercise (n = 29)** | 20.0 (4.5) | 21.3 (4.8) | 1.4 (-0.4, 3.2) |  |  |  | |  |  |
| **Wait-list control (n = 24)** | 19.0 (5.9) | 19.5 (5.4) | 0.5 (-1.7, 2.7) |  |  |  | |  |  |
| **Verbs** | **All participants** |  |  |  | 2.46 | 0.093 | 1.000 (0.09) | | 0.113 (0.48) | 0.280 (0.56) |
|  | **Yoga (n = 27)** | 19.5 (5.0) | 21.4 (8.1) | 2.0 (-0.2, 4.3) |  |  |  | |  |  |
|  | **Aerobic exercise (n = 29)** | 18.7 (5.5) | 20.0 (6.3) | 1.4 (-0.7, 3.6) |  |  |  | |  |  |
|  | **Wait-list control (n = 24)** | 17.9 (4.0) | 16.8 (5.2) | -1.1 (-3.5, 1.3) |  |  |  | |  |  |

**SD = standard deviation, CI = confidence interval**

***Test assumptions of normality and homogeneity of variance were met.**

****Bonferroni adjustment applied**
